# Supplementary material for: The Effect of HIV Treatment Interruption on Subsequent Immunological Response
Source: PubMed Central journal article supplement — Am J Epidemiol. 2023 Apr 12;192(7):1181–91. doi: 10.1093/aje/kwad076 (PMC10326612; doi:10.1093/aje/kwad076), 2023-04-12
Supplement: web_material_kwad076.pdf [file web_material_kwad076.pdf]

## WEB MATERIAL

### The Effect of HIV Treatment Interruption on Subsequent Immunological Response

Christos Thomadakis, Constantin T. Yiannoutsos, Nikos Pantazis, Lameck Diero, Ann Mwangi, Beverly S. Musick, Kara Wools-Kaloustian, and Giota Touloumi

#### Contents:

|                                                                                                                                                                                                                                                                                                                                                                                                                                                                                                                                                                    |          |
|--------------------------------------------------------------------------------------------------------------------------------------------------------------------------------------------------------------------------------------------------------------------------------------------------------------------------------------------------------------------------------------------------------------------------------------------------------------------------------------------------------------------------------------------------------------------|----------|
| <i>Web Appendix. CD4 trends conditional on baseline CD4 counts.....</i>                                                                                                                                                                                                                                                                                                                                                                                                                                                                                            | <i>2</i> |
| <i>Web Figure 1: Differences (and 95% CIs) between estimated CD4 cell count before disengagement from care and after ART re-initiation over time since ART initiation or re-initiation, respectively. Estimates are conditional on being on the same CD4 categories at ART initiation and ART re-initiation. Categories were: 1: [0,50), 2: [50,100), 3: [100,200), 4: [200,250), 5: [250,350), 6: [350,500), 7: [500,] CD4 cells/<math>\mu</math>l.....</i>                                                                                                       | <i>3</i> |
| <i>Web Figure 2: Estimated CD4 evolution since ART initiation (A) and after ART re-initiation (B and C) for individuals who have disengaged from care and subsequently re-engaged in care, with at least one available CD4 count both at/after ART initiation and ART re-initiation, conditionally on being on the same CD4 category at ART initiation and ART re-initiation. (B): All CD4 data at/after ART restart were used (ignoring any subsequent disengagement from care), (C) CD4 data have been censored at the time of the second disengagement.....</i> | <i>4</i> |
| <i>Web Figure 3: Estimated CD4 evolution since ART initiation (i) including individuals who disengaged from care and subsequently re-engaged in care (black solid line; shown is the estimated CD4 evolution before disengagement from care) and (ii) including all individuals initiating ART (red solid line; data censored at the first loss to clinic event, i.e. death or disengagement from care).....</i>                                                                                                                                                   | <i>5</i> |

## WEB APPENDIX

### CD4 Trends Conditional on Baseline CD4 Counts

Based on model assumptions, it follows that

$$\begin{pmatrix} \mathbf{m}_i(\mathbf{0}) \\ \mathbf{m}_i(t) \end{pmatrix} \sim N \left\{ \begin{pmatrix} \mathbf{x}_i^\top(\mathbf{0})\boldsymbol{\beta} \\ \mathbf{x}_i^\top(t)\boldsymbol{\beta} \end{pmatrix}, \begin{pmatrix} \mathbf{z}_i^\top(\mathbf{0})\mathbf{D}\mathbf{z}_i(\mathbf{0}) & \mathbf{z}_i^\top(t)\mathbf{D}\mathbf{z}_i(\mathbf{0}) \\ \mathbf{z}_i^\top(t)\mathbf{D}\mathbf{z}_i(\mathbf{0}) & \mathbf{z}_i^\top(t)\mathbf{D}\mathbf{z}_i(t) \end{pmatrix} \right\}$$

Our goal is to estimate CD4 trajectories conditional on CD4 count at baseline, e.g.  $E\{m_i(t)|m_i(0) < \sqrt{50}\}$ . To simplify the presentation of formulas and to allow for generic truncation limits, let us assume that

$$\begin{pmatrix} X_1 \\ X_2 \end{pmatrix} \sim N \left\{ \begin{pmatrix} \mu_1 \\ \mu_2 \end{pmatrix}, \begin{pmatrix} \sigma_1^2 & \rho\sigma_1\sigma_2 \\ \rho\sigma_1\sigma_2 & \sigma_2^2 \end{pmatrix} \right\},$$

where  $X_1$  refers to  $m_i(0)$  and  $X_2$  refers to  $m_i(t)$  and the remaining quantities are defined accordingly. Then,

$$E(X_2|l < X_1 < u) = \frac{\int_l^u \int_{-\infty}^{+\infty} x_2 f(x_1, x_2) dx_2 dx_1}{\Pr(l < X_1 < u)}$$

with  $f(x_1, x_2)$  denoting the joint distribution of  $(X_1, X_2)$  and  $-\infty \leq l < u \leq \infty$ . Moreover, let  $\varphi(x)$  and  $\Phi(x)$  denote the probability density function and cumulative distribution function of a standard Normal distribution, i.e.  $N(0,1)$ , evaluated at  $x$ , and  $\alpha = \frac{l - \mu_1}{\sigma_1}$  and  $\beta = \frac{u - \mu_1}{\sigma_1}$ . By simple calculations, it follows that,

$$E(X_2|l < X_1 < u) = \frac{\int_l^u \int_{-\infty}^{+\infty} x_2 f(x_2|x_1) dx_2 f(x_1) dx_1}{\Phi(\beta) - \Phi(\alpha)} = \frac{\int_l^u E(X_2|X_1 = x_1) f(x_1) dx_1}{\Phi(\beta) - \Phi(\alpha)}$$

where, by standard properties of the bivariate Normal distribution, it follows that  $E(X_2|X_1 = x_1) = \mu_2 + \rho \frac{\sigma_2}{\sigma_1} (x_1 - \mu_1)$ . After making the change of variables  $w = \frac{x_1 - \mu_1}{\sigma_1}$  in the above integral, it can be easily shown that

$$E(X_2|l < X_1 < u) = \frac{\int_{\alpha}^{\beta} (\mu_2 + \rho\sigma_2 w) \varphi(w) dw}{\Phi(\beta) - \Phi(\alpha)} = \mu_2 - \rho\sigma_2 \frac{\varphi(\beta) - \varphi(\alpha)}{\Phi(\beta) - \Phi(\alpha)}, \quad (1)$$

with the last equation following using integration by parts. Therefore, using Equation 1, we can very easily estimate the CD4 trends conditional on the initial levels,  $E\{m_i(t)|m_i(0) < \sqrt{50}\}$ . As estimation of the standard error of Equation 1 is difficult, we relied on a Monte Carlo procedure by drawing samples from the approximate posterior distribution of the parameters and repeatedly estimating Equation 1 to derive the standard error.

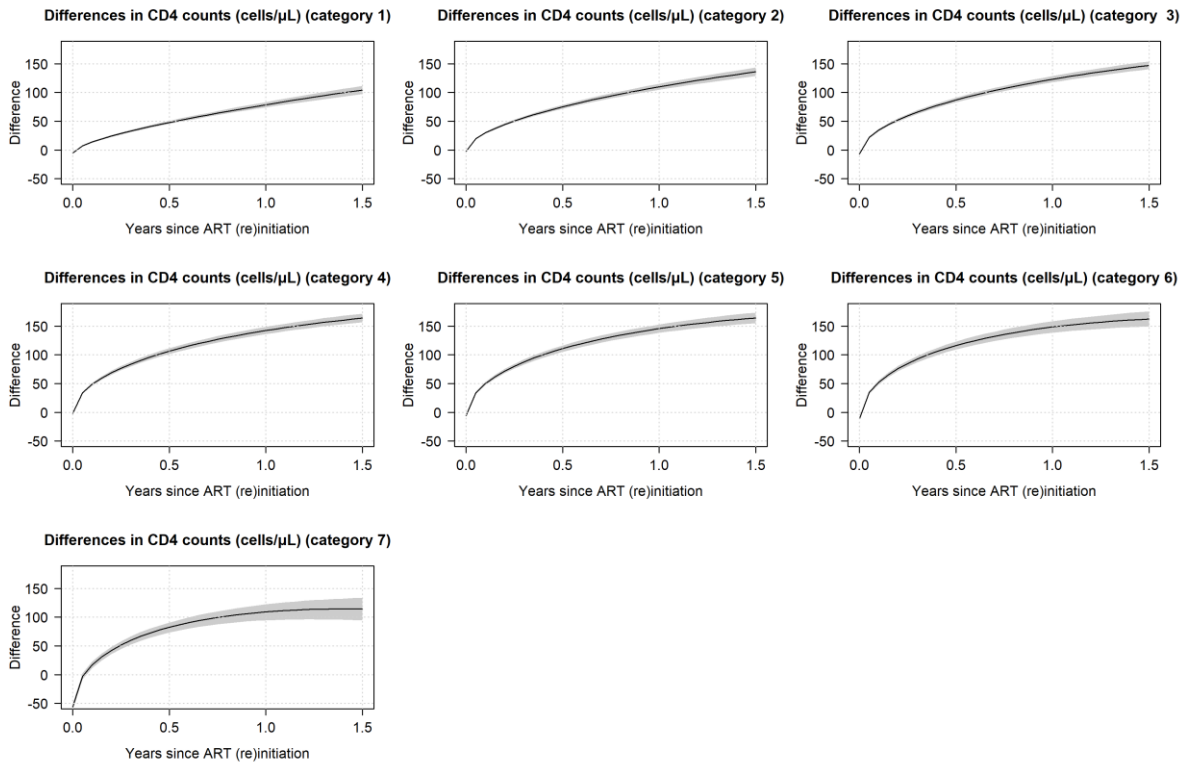

*Web Figure 1: Differences (and 95% CIs) between estimated CD4 cell count before disengagement from care and after ART re-initiation over time since ART initiation or re-initiation, respectively. Estimates are conditional on being on the same CD4 categories at ART initiation and ART re-initiation. Categories were: 1: [0,50), 2: [50,100), 3: [100,200), 4: [200,250), 5: [250,350), 6: [350,500), 7: [500,] CD4 cells/μL.*

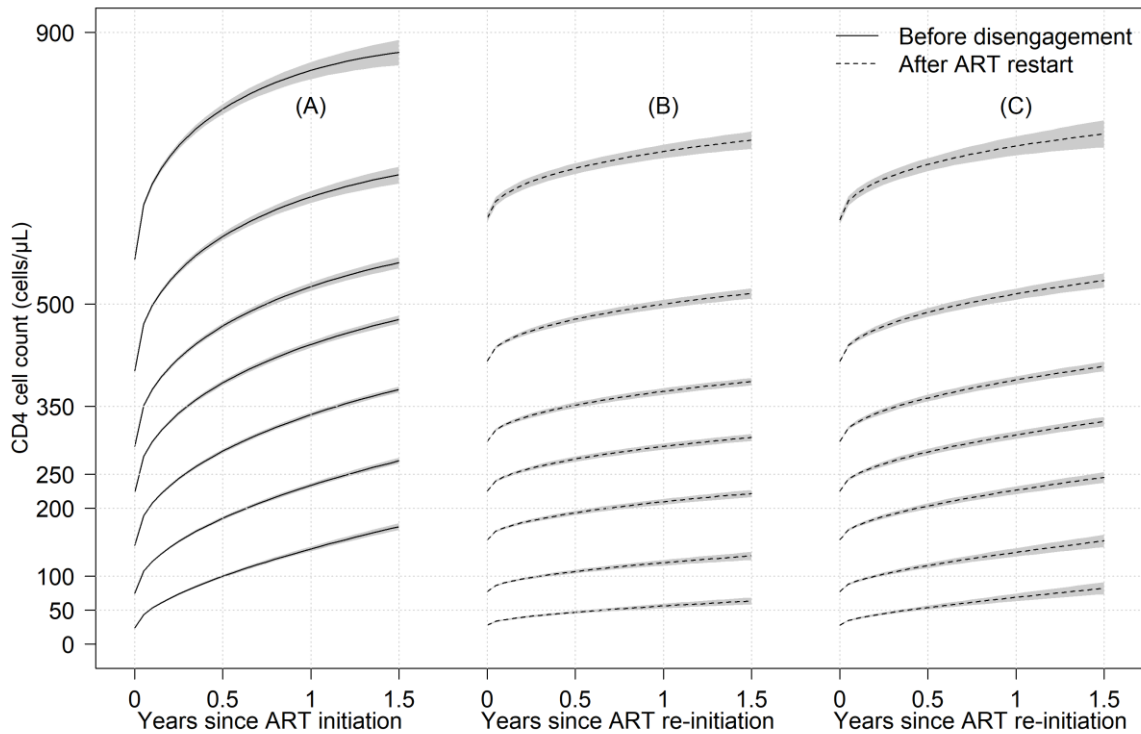

*Web Figure 2: Estimated CD4 evolution since ART initiation (A) and after ART re-initiation (B and C) for individuals who have disengaged from care and subsequently re-engaged in care, with at least one available CD4 count both at/after ART initiation and ART re-initiation, conditionally on being on the same CD4 category at ART initiation and ART re-initiation. (B): All CD4 data at/after ART restart were used (ignoring any subsequent disengagement from care), (C) CD4 data have been censored at the time of the second disengagement.*

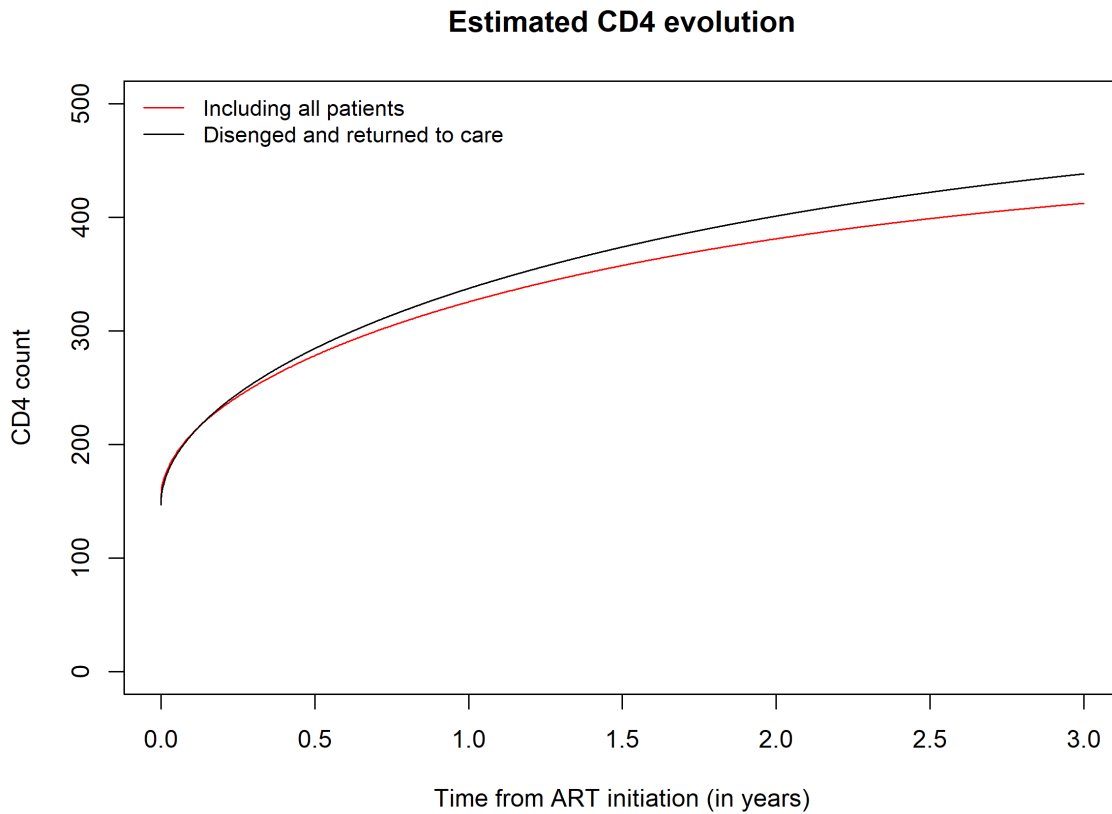

*Web Figure 3: Estimated CD4 evolution since ART initiation (i) including individuals who disengaged from care and subsequently re-engaged in care (black solid line; shown is the estimated CD4 evolution before disengagement from care) and (ii) including all individuals initiating ART (red solid line; data censored at the first loss to clinic event, i.e. death or disengagement from care).*
